# Supplementary material for: Early age decline in DNA repair capacity in the liver: in depth profile of differential gene expression
Source: PubMed Central journal article supplement (PMC5191890; doi:10.18632/aging.101120), 2016-11-30
Supplement: aging-08-3131-s001.pdf [file aging-08-3131-s001.pdf]

SUPPLEMENTARY MATERIAL

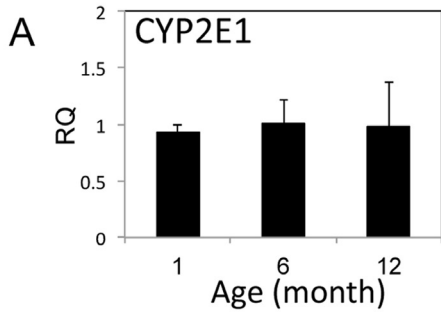

**B**

| General_Gene_Details |                      | Normalized_Counts_per_Sample |           |           |           | log2FoldChang | lfcSE | C_6M / C_3W |           |           | Significance<br>C_6M / C_3W |
|----------------------|----------------------|------------------------------|-----------|-----------|-----------|---------------|-------|-------------|-----------|-----------|-----------------------------|
| Ensembl_Gene_ID      | Associated_Gene_Name | C_3W_1                       | C_3W_2    | C_6M_1    | C_6M_2    |               |       | stat        | pvalue    | padj      |                             |
| ENSMUSG00000060407   | Cyp2a12              | 17486.641                    | 20720.850 | 11402.358 | 13498.510 | -0.617        | 0.135 | -4.560      | 5.107E-06 | 6.159E-04 | yes                         |
| ENSMUSG00000091867   | Cyp2a22              | 1038.661                     | 1209.649  | 33.972    | 35.589    | -5.012        | 0.428 | -11.709     | 1.149E-31 | 2.632E-28 | yes                         |
| ENSMUSG00000074254   | Cyp2a4               | 8867.257                     | 1104.807  | 12.133    | 12.604    | -8.654        | 1.239 | -6.984      | 2.875E-12 | 1.398E-09 | yes                         |
| ENSMUSG00000030483   | Cyp2b10              | 539.903                      | 1124.189  | 211.110   | 40.037    | -2.734        | 0.813 | -3.362      | 7.750E-04 | 2.988E-02 | yes                         |
| ENSMUSG00000040660   | Cyp2b9               | 2004.064                     | 1766.457  | 4.853     | 2.966     | -8.952        | 0.949 | -9.429      | 4.148E-21 | 5.118E-18 | yes                         |
| ENSMUSG00000025004   | Cyp2c40              | 4688.527                     | 9038.446  | 129.820   | 166.822   | -5.528        | 0.367 | -15.072     | 2.493E-51 | 2.000E-47 | yes                         |
| ENSMUSG00000062624   | Cyp2c67              | 3124.012                     | 4374.294  | 7160.749  | 8046.020  | 1.020         | 0.221 | 4.620       | 3.833E-06 | 4.879E-04 | yes                         |
| ENSMUSG00000074882   | Cyp2c68              | 9516.546                     | 12652.414 | 3832.735  | 3773.889  | -1.543        | 0.236 | -6.526      | 6.769E-11 | 2.857E-08 | yes                         |
| ENSMUSG00000092008   | Cyp2c69              | 2722.597                     | 4554.023  | 30.332    | 54.125    | -6.408        | 0.446 | -14.353     | 1.018E-46 | 4.084E-43 | yes                         |
| ENSMUSG00000023963   | Cyp3a1               | 2693.495                     | 2759.373  | 463.471   | 368.492   | -2.714        | 0.335 | -8.114      | 4.916E-16 | 3.943E-13 | yes                         |
| ENSMUSG00000054417   | Cyp3a44              | 69.244                       | 115.414   | 6.066     | 8.156     | -3.676        | 0.677 | -5.431      | 5.603E-08 | 1.362E-05 | yes                         |
| ENSMUSG00000061292   | Cyp3a59              | 2779.799                     | 4266.809  | 707.339   | 1289.350  | -1.818        | 0.329 | -5.517      | 3.451E-08 | 8.516E-06 | yes                         |
| ENSMUSG00000066071   | Cyp4a12a             | 2491.784                     | 5445.622  | 8244.203  | 8639.165  | 1.089         | 0.339 | 3.211       | 1.324E-03 | 4.240E-02 | yes                         |
| ENSMUSG00000078597   | Cyp4a12b             | 440.553                      | 940.055   | 2920.353  | 2962.762  | 2.091         | 0.449 | 4.660       | 3.160E-06 | 4.087E-04 | yes                         |
| ENSMUSG00000039519   | Cyp7b1               | 663.338                      | 1494.220  | 4651.696  | 9310.903  | 2.694         | 0.389 | 6.922       | 4.455E-12 | 2.042E-09 | yes                         |

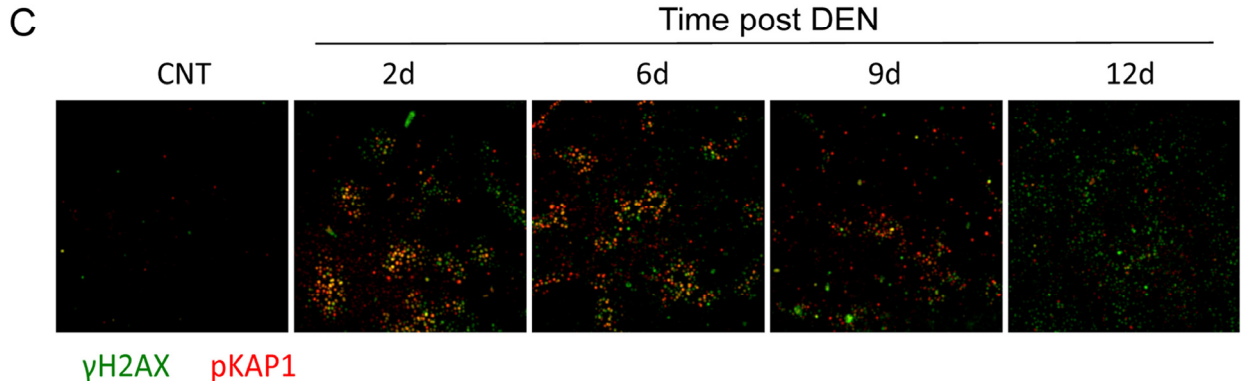

**Supplementary Figure S1. Delayed DNA damage response in 6-month-old mice.** (A) RT-qPCR analysis of CYP2E1 expression in RNA extracts from frozen liver tissues harvested from mice at the indicated ages. (B) A table presenting RNAseq data for the 15 CYP genes that show differential expression between 1 and 6 month-old mice. 11 genes were downregulated with age and only five genes were upregulated. (C) Six-month-old mice were injected with DEN and the levels of residual damage before and after 2, 6, 9 and 12 days were determined as above. Representative images of γH2AX (green) and pKAP-1 (red) staining are shown.

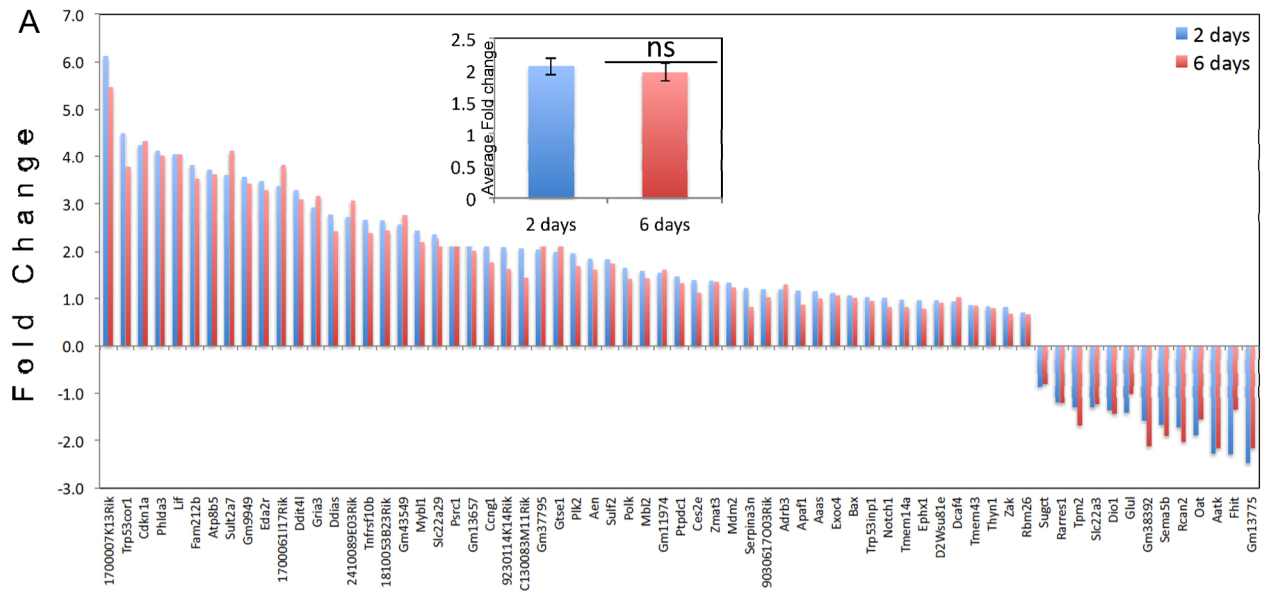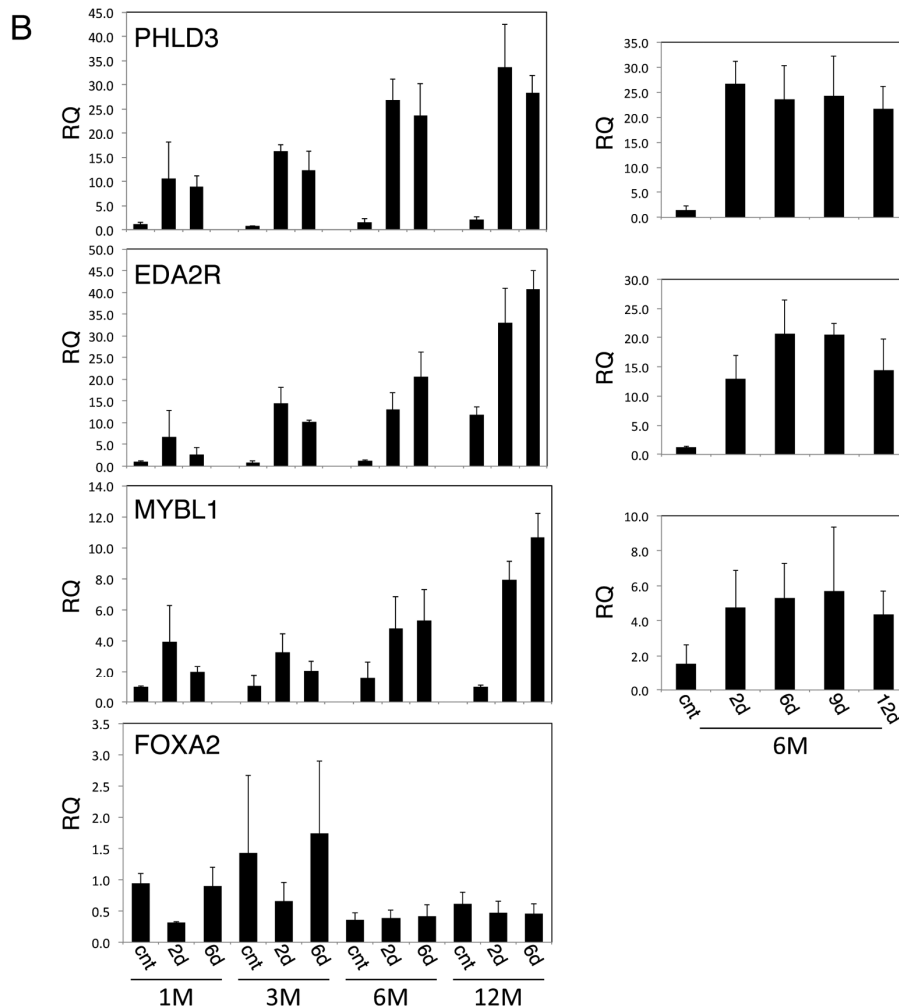

**Supplementary Figure S2. Gene expression profiles following DEN treatment.** (A) Plot depicting the fold-change of 67 transcripts that are differentially expressed both in 2 days (blue bars) and 6 days (red bars) after DEN treatment in 6-month-old mice. Inset shows the average fold changes of all 67 genes  $\pm$ SD. ns. non-significant. (B) qRT-PCR analysis of genes representing differential gene expression patterns in response to DEN treatment. Left panels: The level of gene expression in 1, 3, 6 and 12-month old mice before and 2 and 6 days after DEN treatment. Right panels: the level of gene expression before and 2, 6, 9 and 12 days after DEN treatment in 6-month-old mice.

Network1\_Cancer organismal injury and abnormality and cell cycle

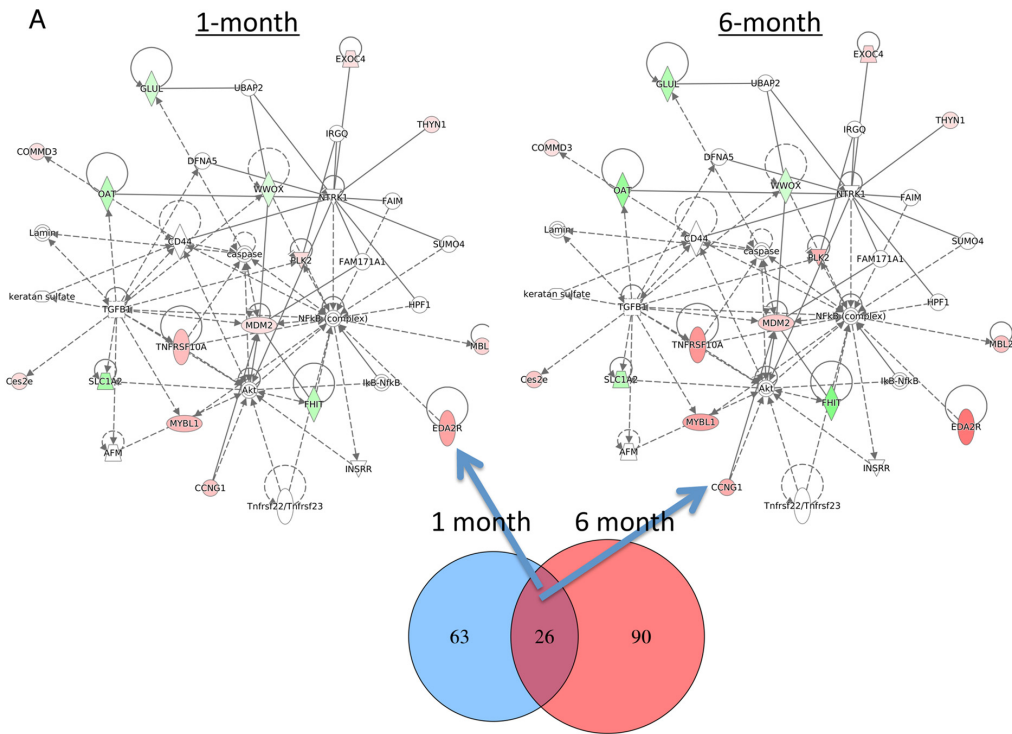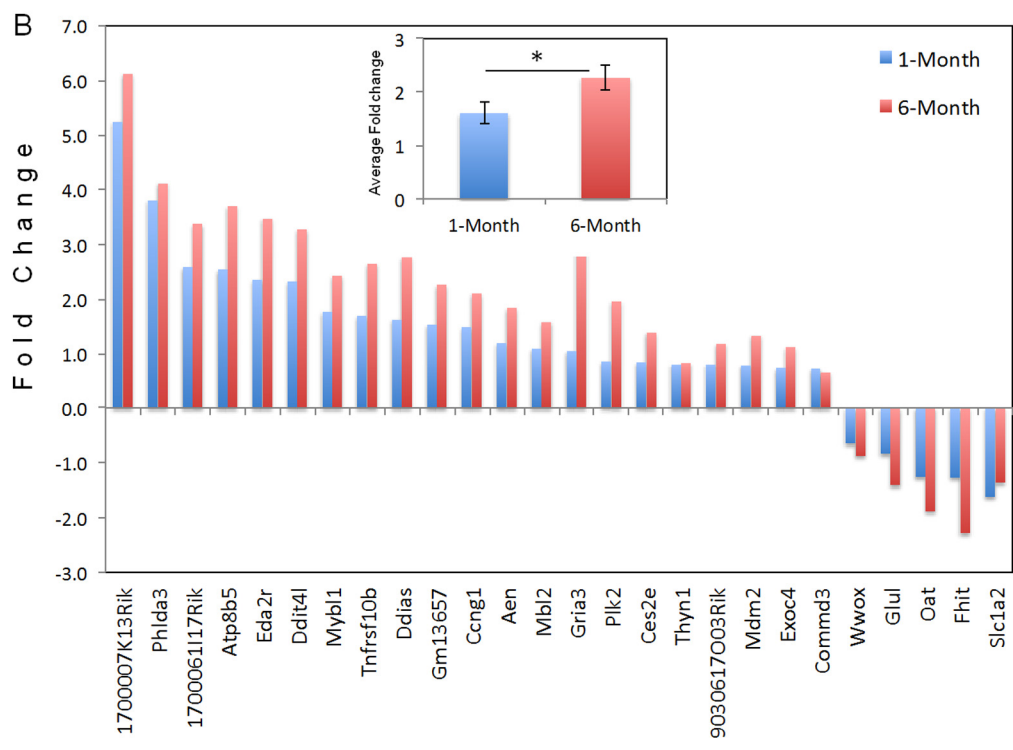

**Supplementary Figure S3. DEN induce a robust transcriptional response in 6-month-old mice. (A)** Age-related IPA enriched interaction network for 26 differentially expressed transcripts 2 days after DEN that are common for both 1- and 6-month-old mice. Each gene is colored according to the directionality of expression; red-upregulated, green-downregulated. Color intensity is proportional to the fold change of that particular gene. **(B)** Graph depicting the fold-change of all 26 transcripts that are differentially expressed in both 1-month (blue bars) and 6-month old mice (red bars) 2 days after DEN treatment. Inset shows the average fold changes of all genes for the two ages  $\pm$ SD. \*  $p < 0.05$ .

**A**

| Upstream Regulators (Activated) | Activation z-score | p-value of overlap | Target molecules in dataset                                    |
|---------------------------------|--------------------|--------------------|----------------------------------------------------------------|
| cisplatin                       | 2.651              | 3.25E-05           | CCNG1, ENDOG, FOS, GDF15, JUN, MDM2, OAT, PHLDA3, PLK2, ZNF174 |
| IL1B                            | 2.387              | 5.63E-03           | DDIAS, FOS, GOS2, GDF15, IL1R1, JUN, SLC1A2, TNFRSF10A         |
| hydrogen peroxide               | 2.328              | 2.93E-03           | DDIAS, FOS, GOS2, GDF15, IL1R1, JUN, SLC1A2, TNFRSF10A         |

**B**

| Upstream Regulators (Activated) | Activation z-score | p-value of overlap | Target molecules in dataset                                                                                                                                                                                                      |
|---------------------------------|--------------------|--------------------|----------------------------------------------------------------------------------------------------------------------------------------------------------------------------------------------------------------------------------|
| TP53                            | 2.000              | 3.57E-04           | ADRB3, AEN, APAF1, BAX, CCNG1, CDKN1A, DDIA, DDIT4L, EDA2R, EPHX1, FAM212B, GAS6, GLUL, GNA14, GTSE1, LIF, MDM2, MYBL1, NOTCH1, OAT, PARK2, PHLDA3, PLK2, POLK, PSRC1, SERPINA3, SESN2, TMEM43, TNFRSF10A, TP53INP1, Tpm2, ZMAT3 |
| TNF                             | 3.937              | 1.53E-20           | AATK, ADRB3, APAF1, BAX, BCL2L1, BTG2, CDKN1A, DDIA, DIO1, DUSP6, LIF, MBL2, NFE2L2, NOTCH1, PLK2, RCAN2, SERPINA3, SLC1A2, TNFRSF10A, TP53INP1, ZAK                                                                             |
| CDKN2A                          | 3.239              | 3.08E-08           | AK1, APAF1, BAX, BTG2, CCNG1, CDKN1A, GTSE1, MDM2, POLK, TP53INP1, ZMAT3                                                                                                                                                         |
| IL1B                            | 2.639              | 5.97E-05           | BAX, BCL2L1, BTG2, CDKN1A, CYP8B1, DDIA, DIO1, GAS6, LIF, NFE2L2, SERPINA3, SLC1A2, TNFRSF10A                                                                                                                                    |
| NFE2L2                          | 2.597              | 4.62E-05           | APOA4, BCL2L1, CDKN1A, Cyp2a12/Cyp2a22, EPHX1, GNA14, NFE2L2, OAT, SERPIN A3                                                                                                                                                     |
| methyl methanesulfonate         | 2.596              | 5.47E-10           | BTG2, CCNG1, CDKN1A, LIF, MDM2, PHLDA3, TP53INP1                                                                                                                                                                                 |
| doxorubicin                     | 2.434              | 6.15E-07           | APAF1, BAX, BCL2L1, BTG2, CDKN1A, DDIA, MDM2, NFE2L2, PSRC1, TNFRSF10A, TP53INP1                                                                                                                                                 |
| 1,2-dithiol-3-thione            | 2.433              | 2.56E-04           | APOA4, Cyp2a12/Cyp2a22, EPHX1, GNA14, NFE2L2, SERPINA3                                                                                                                                                                           |
| topotecan                       | 2.415              | 1.28E-05           | CDKN1A, FHIT, MDM2, PARD3B, PARK2, PLK2, SESN2                                                                                                                                                                                   |
| FGF2                            | 2.401              | 6.56E-04           | BAX, BCL2L1, BTG2, CDKN1A, GRIA3, MDM2, NOTCH1                                                                                                                                                                                   |
| benzo(a)pyrene                  | 2.400              | 3.62E-04           | BAX, CDKN1A, EPHX1, GNA14, MDM2, ZMAT3                                                                                                                                                                                           |
| CHEK2                           | 2.400              | 3.75E-11           | APAF1, BAX, BCL2L1, CCNG1, CDKN1A, MDM2                                                                                                                                                                                          |
| KRAS                            | 2.236              | 1.72E-05           | BCL2L1, CDKN1A, DUSP6, GLUL, MDM2, NFE2L2, SERPINA3, TNFRSF10A, Tpm2                                                                                                                                                             |
| idarubicin                      | 2.236              | 1.34E-08           | BAX, CDKN1A, MDM2, SESN2, TP53INP1                                                                                                                                                                                               |
| arsenite                        | 2.236              | 8.37E-05           | CDKN1A, FHIT, MDM2, NFE2L2, VWOX                                                                                                                                                                                                 |
| NFKB (complex)                  | 2.219              | 8.28E-06           | BAX, BCL2L1, CDKN1A, DIO1, GAS6, LIF, MBL2, MDM2, MYBL1, NOTCH1, PLK2, SERPINA3                                                                                                                                                  |
| SLC29A1                         | 2.200              | 1.34E-08           | BAX, CCNG1, CDKN1A, MDM2, TP53INP1                                                                                                                                                                                               |
| gentamicin                      | 2.196              | 3.88E-03           | BAX, BTG2, CCNG1, DIO1, MDM2                                                                                                                                                                                                     |
| paclitaxel                      | 2.186              | 3.58E-06           | BAX, BCL2L1, BTG2, CCNG1, CDKN1A, DUSP6, MDM2, TNFRSF10A, TP53INP1                                                                                                                                                               |
| cytarabine                      | 2.183              | 8.82E-06           | BAX, CDKN1A, MDM2, SESN2, TP53INP1                                                                                                                                                                                               |

**C**

| Upstream Regulators (Activated) | Activation z-score | p-value of overlap | Target molecules in dataset                                                                                                                                                                                  |
|---------------------------------|--------------------|--------------------|--------------------------------------------------------------------------------------------------------------------------------------------------------------------------------------------------------------|
| TP53                            | 3.838              | 6.55E-18           | ADRB3, AEN, APAF1, BAX, CCNG1, CDKN1A, DDIA, DDIT4L, EDA2R, EPHX1, FAM212B, GLUL, GSTM1, GTSE1, LIF, MDM2, MYBL1, NOTCH1, OAT, PHLDA3, PLK2, POLK, PSRC1, SERPINA3, TMEM43, TNFRSF10A, TP53INP1, Tpm2, ZMAT3 |
| TNF                             | 3.011              | 2.01E-07           | AATK, ADRB3, APAF1, BAX, CDKN1A, CFD, DDIA, DIO1, FAM198B, GPD1, LIF, MBL2, NOTCH1, PLK2, RCAN2, SERPINA3, TNFRSF10A, TP53INP1, ZAK                                                                          |
| CDKN2A                          | 2.922              | 1.52E-07           | APAF1, BAX, CCNG1, CDKN1A, GTSE1, MDM2, POLK, TP53INP1, ZMAT3                                                                                                                                                |
| lipopolysaccharide              | 2.645              | 8.99E-03           | BAX, CDKN1A, CFD, GPD1, GTSE1, LIF, MBL2, NOTCH1, PLK2, SERPINA3, Tpm2                                                                                                                                       |
| doxorubicin                     | 2.497              | 1.68E-05           | APAF1, BAX, CDKN1A, DDIA, MDM2, PSRC1, TNFRSF10A, TP53INP1                                                                                                                                                   |
| IFNG                            | 2.441              | 4.16E-03           | BAX, CDKN1A, DDIA, DIO1, GLUL, LIF, MDM2, NOTCH1, RARRES1, TNFRSF10A                                                                                                                                         |
| methyl methanesulfonate         | 2.401              | 3.09E-09           | CCNG1, CDKN1A, LIF, MDM2, PHLDA3, TP53INP1                                                                                                                                                                   |
| ethanol                         | 2.401              | 3.09E-09           | BAX, CDKN1A, EPHX1, GSTM1, MDM2, ZMAT3                                                                                                                                                                       |
| benzo(a)pyrene                  | 2.401              | 5.19E-05           | BAX, CDKN1A, EPHX1, GSTM1, MDM2, ZMAT3                                                                                                                                                                       |
| mitomycin C                     | 2.374              | 2.70E-08           | BAX, CDKN1A, MDM2, PSRC1, TP53INP1, ZMAT3                                                                                                                                                                    |
| SLC29A1                         | 2.219              | 2.25E-09           | BAX, CCNG1, CDKN1A, MDM2, TP53INP1                                                                                                                                                                           |
| ETS1                            | 2.215              | 4.33E-04           | BAX, CCNG1, CDKN1A, MDM2, MGAT5                                                                                                                                                                              |
| NR112                           | 2.207              | 7.00E-05           | CDKN1A, GLUL, GSTM1, Gstm3, Mup1 (includes others)                                                                                                                                                           |
| CHEK2                           | 2.186              | 8.53E-10           | APAF1, BAX, CCNG1, CDKN1A, MDM2                                                                                                                                                                              |
| doxifluridine                   | 2.176              | 1.21E-09           | BAX, CCNG1, CDKN1A, MDM2, TP53INP1                                                                                                                                                                           |
| ethanol                         | 2.156              | 4.26E-03           | BAX, CDKN1A, EPHX1, Gstm3, TP53INP1                                                                                                                                                                          |
| cisplatin                       | 2.067              | 4.03E-08           | BAX, CCNG1, CDKN1A, CLSN3, GSTM1, MDM2, NOTCH1, OAT, PHLDA3, PLK2, PSRC1, TP53INP1, ZMAT3                                                                                                                    |
| ZBTB33                          | 2.000              | 9.52E-08           | APAF1, BAX, CDKN1A, TNFRSF10A                                                                                                                                                                                |
| RASSF1                          | 2.000              | 1.16E-04           | CDKN1A, LIF, PLK2, TP53INP1                                                                                                                                                                                  |
| INH A                           | 2.000              | 2.53E-04           | BAX, EPHX1, TP53INP1, Tpm2                                                                                                                                                                                   |
| idarubicin                      | 2.000              | 2.68E-07           | BAX, CDKN1A, MDM2, TP53INP1                                                                                                                                                                                  |

**Supplementary Figure S4. Upstream regulators and protein interaction network analysis.** IPA upstream regulator analysis for differentially expressed genes 2 days after DEN treatment in 1-month (A) and 6-month-old mice (B; top 20 are shown) as well as 6 days after DEN in 6-month-old mice (C).

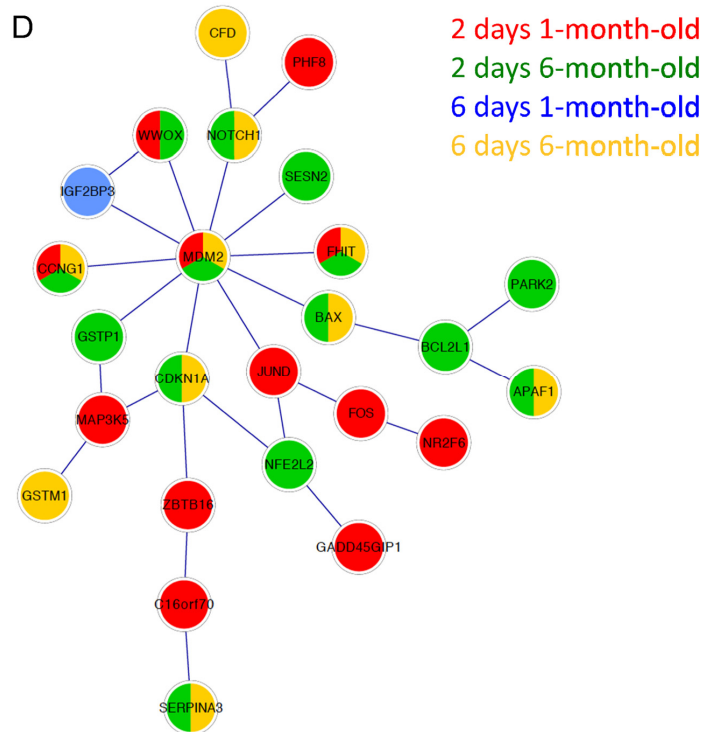

**Supplementary Figure S4. Upstream regulators and protein interaction network analysis.** (D) Protein:protein interaction network constructed for the differentially expressed genes of the various comparisons. Nodes representing interacting proteins and were colored as a pie chart based on their differential expression in any of the four indicated comparisons.

**Supplementary Table 1. Oligonucleotide Sequences for qRT-PCR.**

| Target gene   | Forward Primer               | Reverse Primer                 |
|---------------|------------------------------|--------------------------------|
| <i>MYBL1</i>  | 5'-GAAACCGTTGGGCCGAGATT-3'   | 5'-CCATCTTGTAATAGCCCTCCTG-3'   |
| <i>Eda2r</i>  | 5'-CACACTGCATAGTCTGCCCTC-3'  | 5'-GCCTTCTGGACCCGATTGA-3'      |
| <i>Foxa2</i>  | 5'-CATGGGACCTCACCTGAGTC-3'   | 5'-CATCGAGTTCATGTTGGCGTA-3'    |
| <i>PHLDA3</i> | 5'-CCGTGGAGTGCCTAGAGAG-3'    | 5'-CCAGGGTGATCTGAGCGTT-3'      |
| <i>Cyp2e1</i> | 5'-CCACCAGCACAACTCTGAGATA-3' | 5'-CCCAATAACCCTGTCAATTTCTT-3'  |
| <i>HPRT</i>   | 5'-GCGATGATGAACCAGGTTATGA-3' | 5'-ATCTCGAGCAAGTCTTTCAGTCCT-3' |
